# Supplementary material for: Safety and efficacy of re-treatments with pyronaridine-artesunate in African patients with malaria: a substudy of the WANECAM randomised trial
Source: PubMed Central journal article supplement — Lancet Infect Dis. 2016 Feb;16(2):189–98. doi: 10.1016/S1473-3099(15)00318-7 (PMC4726763; doi:10.1016/s1473-3099(15)00318-7), 2016-02
Supplement: mmc1.pdf [file mmc1.pdf]

## Supplementary webappendix

This webappendix formed part of the original submission and has been peer reviewed. We post it as supplied by the authors.

Supplement to: Sagara I, Beavogui AH, Zongo I, et al. Safety and efficacy of re-treatments with pyronaridine-artesunate in African patients with malaria: a substudy of the WANECAM randomised trial. *Lancet Infect Dis* 2015; published online Oct 23. [http://dx.doi.org/10.1016/S1473-3099\(15\)00318-7](http://dx.doi.org/10.1016/S1473-3099(15)00318-7).

## Supplementary appendix

### Safety and efficacy of retreatments with pyronaridine-artesunate in African malaria patients

Sagara, et al.

**Table S1: Dosing of pyronaridine-artesunate granule sachets and tablets and artemether-lumefantrine dispersible tablets and tablets was by body weight**

| <b>Drug</b>             | <b>Body weight, kg</b> | <b>Dose and presentation</b> |
|-------------------------|------------------------|------------------------------|
| Pyronaridine-artesunate | 5–<8                   | 1 sachet                     |
|                         | 8–<15                  | 2 sachets                    |
|                         | 15–<20                 | 3 sachets                    |
|                         | 20–<24                 | 1 tablet                     |
|                         | 24–<45                 | 2 tablets                    |
|                         | 45–<65                 | 3 tablets                    |
|                         | ≥65                    | 4 tablets                    |
| Artemether-lumefantrine | 5–<15                  | 1 dispersible tablet         |
|                         | 15–<25 kg              | 2 dispersible tablets        |
|                         | 25–<35                 | 3 tablets                    |
|                         | ≥35                    | 4 tablets                    |

**Table S2: Adequate clinical and parasitological response (ACPR) at Day 28 and Day 42 in malaria patients treated with pyronaridine-artesunate or artemether-lumefantrine (episode 1, efficacy population; episodes 2–9, efficacy retreatment population)**

| ACPR at:                              | Day 28                             |                                    | Day 42                             |                                    |
|---------------------------------------|------------------------------------|------------------------------------|------------------------------------|------------------------------------|
|                                       | Pyronaridine-artesunate<br>(n=673) | Artemether-lumefantrine<br>(n=671) | Pyronaridine-artesunate<br>(n=673) | Artemether-lumefantrine<br>(n=671) |
| Crude ACPR (intent-to-treat analysis) |                                    |                                    |                                    |                                    |
| Episode 1                             | 93.2 (620/665) [91.0–95.0]         | 80.4 (528/657) [77.1–83.3]         | 80.0 (532/665) [76.8–83.0]         | 65.9 (433/657) [62.1–69.5]         |
| Episode 2                             | 91.6 (197/215) [87.1–95.0]         | 80.3 (188/234) [74.7–85.2]         | 67.9 (146/215) [61.2–74.1]         | 60.7 (142/234) [54.1–67.0]         |
| Episode 3                             | 90.6 (58/64) [80.7–96.5]           | 82.1 (64/78) [71.7–89.8]           | 62.5 (40/64) [49.5–74.3]           | 62.8 (49/78) [51.1–73.5]           |
| Episode 4                             | 95.7 (22/23) [78.1–99.9]           | 73.7 (14/19) [48.8–90.9]           | 78.3 (18/23) [56.3–92.5]           | 63.2 (12/19) [38.4–83.7]           |
| Episode 5                             | 66.7 (2/3) [9.4–99.2]              | 100 (4/4) [39.8–100]               | 33.3 (1/3) [0.8–90.6]              | 50 (2/4) [6.8–93.2]                |
| Episode 6–9*                          | 100 (4/4)                          | 100 (1/1) [2.5–100]                | 100 (4/4)                          | 0 (0/1) [0–97.5]                   |
| Overall (GEE model)                   | 92.7 [91.0–94.3]                   | 80.4 [77.8–83.0]                   | 77.3 [74.5–80.1]                   | 65.4 [62.2–68.5]                   |
| Treatment difference                  | 12.3 [9.1–15.4], $P < 0.001$       |                                    | 12.0 [7.7–16.2], $P < 0.001$       |                                    |

PCR-adjusted ACPR (efficacy  
evaluable analysis)

|              |                            |                            |                            |                            |
|--------------|----------------------------|----------------------------|----------------------------|----------------------------|
| Episode 1    | 95.2 (628/660) [93.2–96.7] | 96.4 (583/605) [94.5–97.7] | 93.5 (565/604) [91.3–95.4] | 95.7 (467/488) [93.5–97.3] |
| Episode 2    | 96.2 (205/213) [92.7–98.4] | 98.1 (212/216) [95.3–99.5] | 91.3 (167/183) [86.2–94.9] | 94.1 (159/169) [89.4–97.1] |
| Episode 3    | 96.8 (61/63) [89.0–99.6]   | 95.8 (68/71) [88.1–99.1]   | 91.7 (44/48) [80.0–97.7]   | 91.5 (54/59) [81.3–97.2]   |
| Episode 4    | 100 (23/23) [85.2–100]     | 94.1 (16/17) [71.3–99.9]   | 94.7 (18/19) [74.0–99.9]   | 92.3 (12/13) [64.0–99.8]   |
| Episode 5    | 100 (3/3) [29.2–100]       | 100 (4/4) [39.8–100]       | 100 (2/2) [15.8–100]       | 100 (3/3) [29.2–100]       |
| Episode 6–9* | 100 (4/4)                  | 100 (1/1) [2.5–100]        | 100 (4/4)                  | –                          |

---

Data are ACPR % (n/N) [95%CI] except for overall (GEE model) which is % [95%CI].

\*All four episodes 6–9 in the pyronaridine-artesunate group occurred in the same patient; all were treated successfully with pyronaridine-artesunate. One patient had a malaria episode 6 in the artemether-lumefantrine group which was a reinfection based on PCR results.

**Table S3: Kaplan-Meier estimates of parasite clearance time (PCT) in malaria patients treated with pyronaridine-artesunate or artemether-lumefantrine (episode 1, efficacy population; episodes 2–9, efficacy retreatment population)**

| Episode | Pyronaridine-artesunate (n=673) |                  | Artemether-lumefantrine (n=671) |                  |
|---------|---------------------------------|------------------|---------------------------------|------------------|
|         | Parasite clearance              | Median PCT       | Parasite clearance              | Median PCT       |
|         | n/N                             | (95%CI)          | n/N                             | (95%CI)          |
| 1       | 645/665                         | 24.8 (24.3–33.9) | 648/658                         | 34.5 (34.2–35.2) |
| 2       | 213/214                         | 24.1 (23.9–24.5) | 232/233                         | 24.2 (23.9–24.6) |
| 3       | 64/64                           | 23.9 (23.3–24.5) | 76/77                           | 24.5 (23.9–25.0) |
| 4       | 23/23                           | 24.1 (23.5–24.4) | 19/19                           | 24.1 (23.3–34.4) |
| 5       | 3/3                             | 24.6 (12.8–24.6) | 4/4                             | 24.6 (11.8–37.4) |
| 6       | 1/1                             | 11.9 (–)         | 1/1                             | 25.5 (–)         |
| 7       | 1/1                             | 23.5 (–)         | –                               | –                |
| 8       | 1/1                             | 34.4 (–)         | –                               | –                |
| 9       | 1/1                             | 21.1 (–)         | –                               | –                |

Data are median (two-sided 95%CI).
